# Supplementary material for: Diversity in a simple co-crystal: racemic and kryptoracemic behaviour
Source: Royal Society of Chemistry journal article supplement (doi:10.1039/c6cc04148e), 2016-01-01
Supplement: c6cc04148e1.pdf [file c6cc04148e1.pdf]

## Diversity in a Simple Co-crystal: Racemic and Kryptoracemic Behaviour

U. B. Rao Khandavilli, Matteo Lusi, Balakrishna R. Bhogala, Anita R. Maguire, M. Stein,  
Simon E. Lawrence\*

[simon.lawrence@ucc.ie](mailto:simon.lawrence@ucc.ie)

### Supporting Information

|                                                                        | <b>Page</b> |
|------------------------------------------------------------------------|-------------|
| IR spectra for Forms I and III                                         | S2          |
| Raman spectra for Forms I and III                                      | S2          |
| DSC data for Forms I and III                                           | S3          |
| Summary crystallographic data                                          | S3          |
| PXRD data for Forms I and III                                          | S4          |
| Selected torsion angles for the amide molecules in Forms I, II and III | S5          |
| Polymorph screen                                                       | S6          |
| Microscopy images of Forms I and III                                   | S6          |
| Precession photos for Forms I and II                                   | S7          |
| Details of periodic DFT calculations                                   | S9          |
| Slurry Experiments                                                     | S10         |

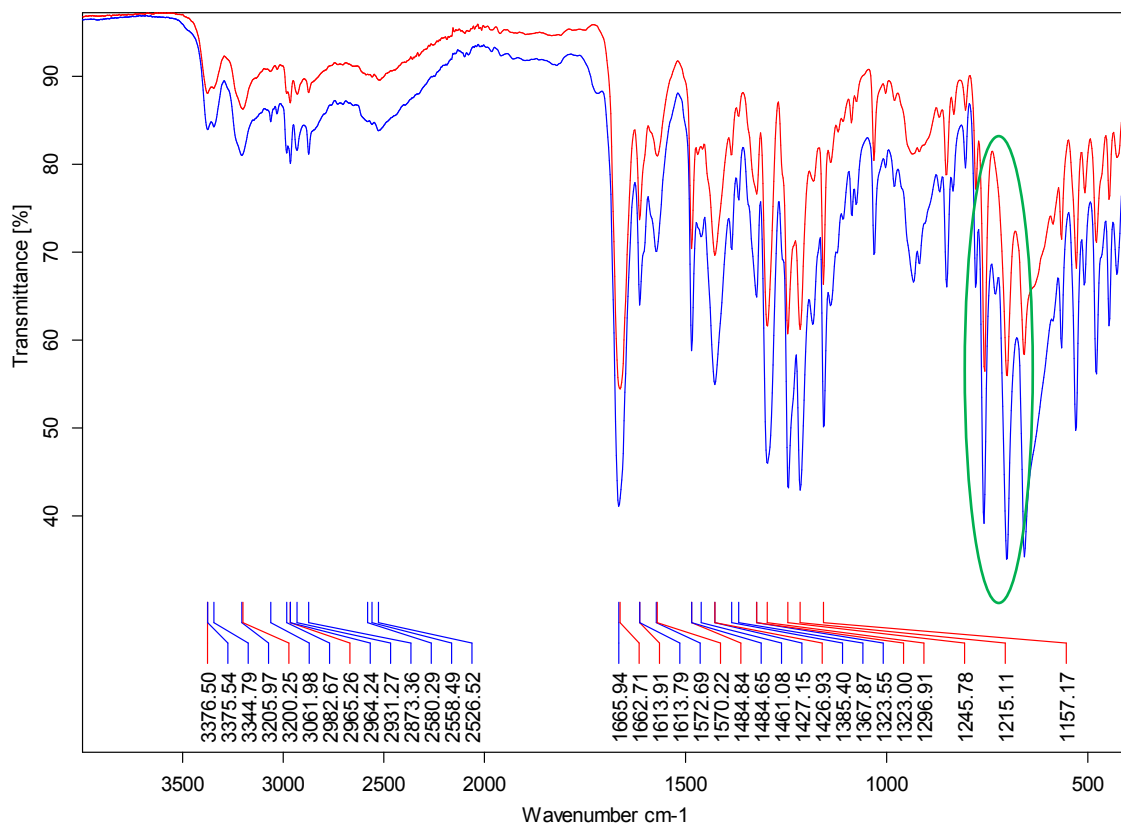

**Figure 1.** IR spectra for Forms I (blue) and Form III (red): the green circle highlights an extra peak in Form I

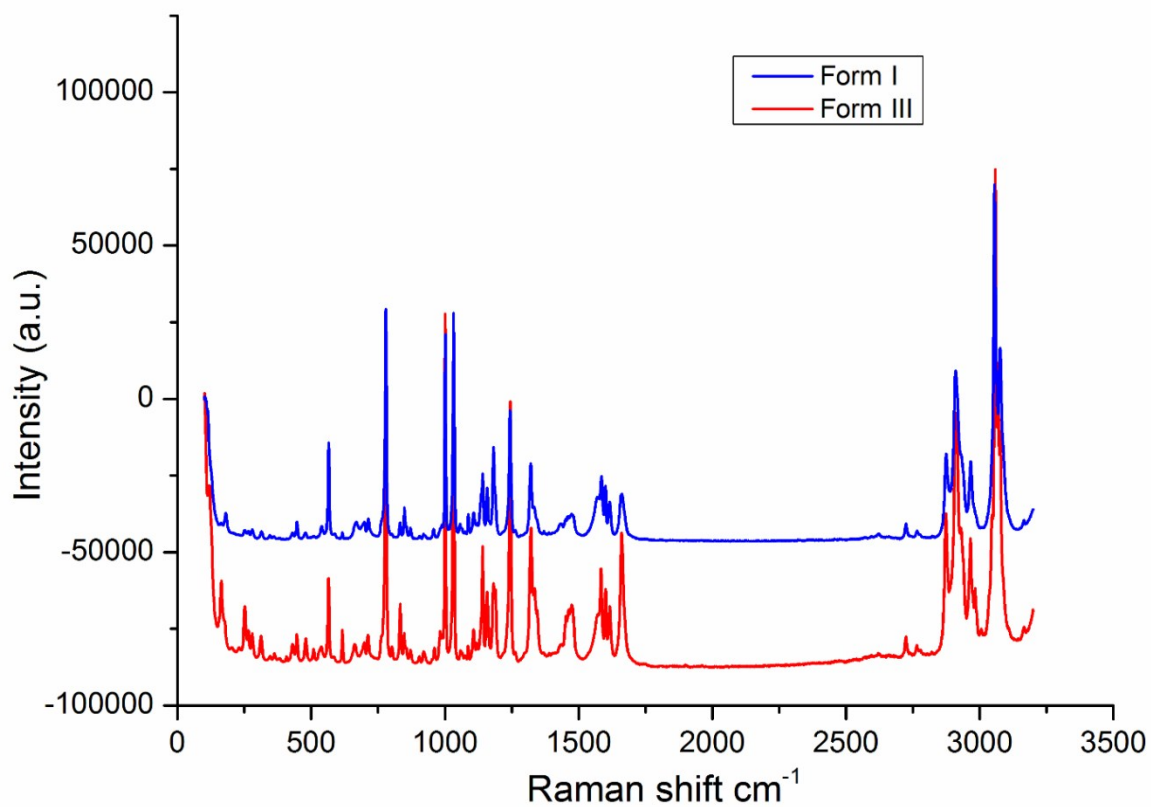

**Figure 2.** Raman spectra for Forms I (blue) and Form III (red)

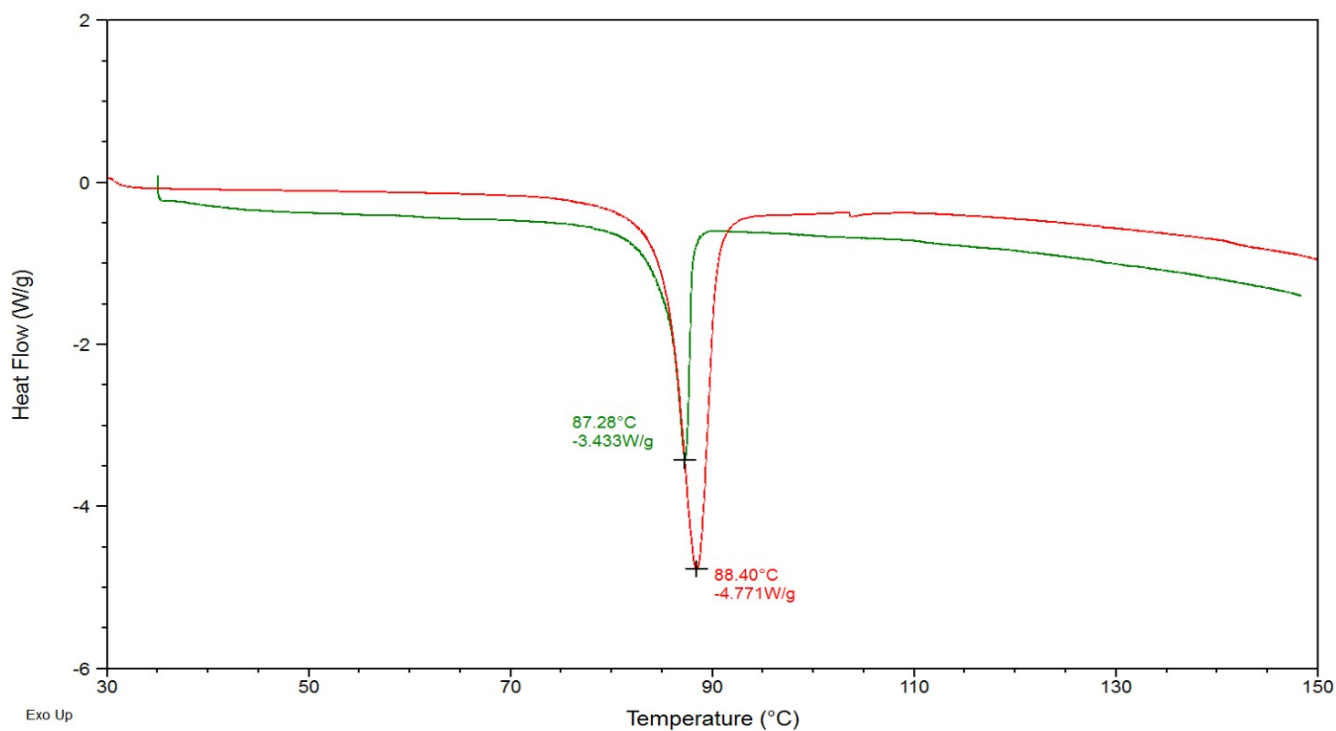

**Figure 3.** DSC data for Forms I (green) and Form III (red)

**Table 1.** Summary crystallographic data

|                                        | <b>Form I</b>                                       | <b>Form II</b>            | <b>Form III</b>             |
|----------------------------------------|-----------------------------------------------------|---------------------------|-----------------------------|
| Crystal System                         | orthorhombic                                        | monoclinic                | monoclinic                  |
| Space Group, <i>Z</i>                  | <i>P2<sub>1</sub>2<sub>1</sub>2<sub>1</sub></i> , 4 | <i>P2<sub>1</sub></i> , 2 | <i>P2<sub>1</sub>/c</i> , 4 |
| <i>a</i> , Å                           | 10.0924(6)                                          | 9.882(4)                  | 10.0661 (14)                |
| <i>b</i> , Å                           | 16.2467(12)                                         | 20.953(8)                 | 21.081(3)                   |
| <i>c</i> , Å                           | 21.2038(15)                                         | 16.215(6)                 | 16.584(2)                   |
| $\alpha$ , °                           | 90                                                  | 90                        | 90                          |
| $\beta$ , °                            | 90                                                  | 93.913(11)                | 100.060(4)                  |
| $\gamma$ , °                           | 90                                                  | 90                        | 90                          |
| <i>V</i> , Å <sup>3</sup>              | 3476.8(4)                                           | 3350.0(2)                 | 3465.1(8)                   |
| <i>D<sub>c</sub></i> gcm <sup>-3</sup> | 1.174                                               | 1.251                     | 1.209                       |
| <i>T</i> , K                           | 300                                                 | 100                       | 300                         |

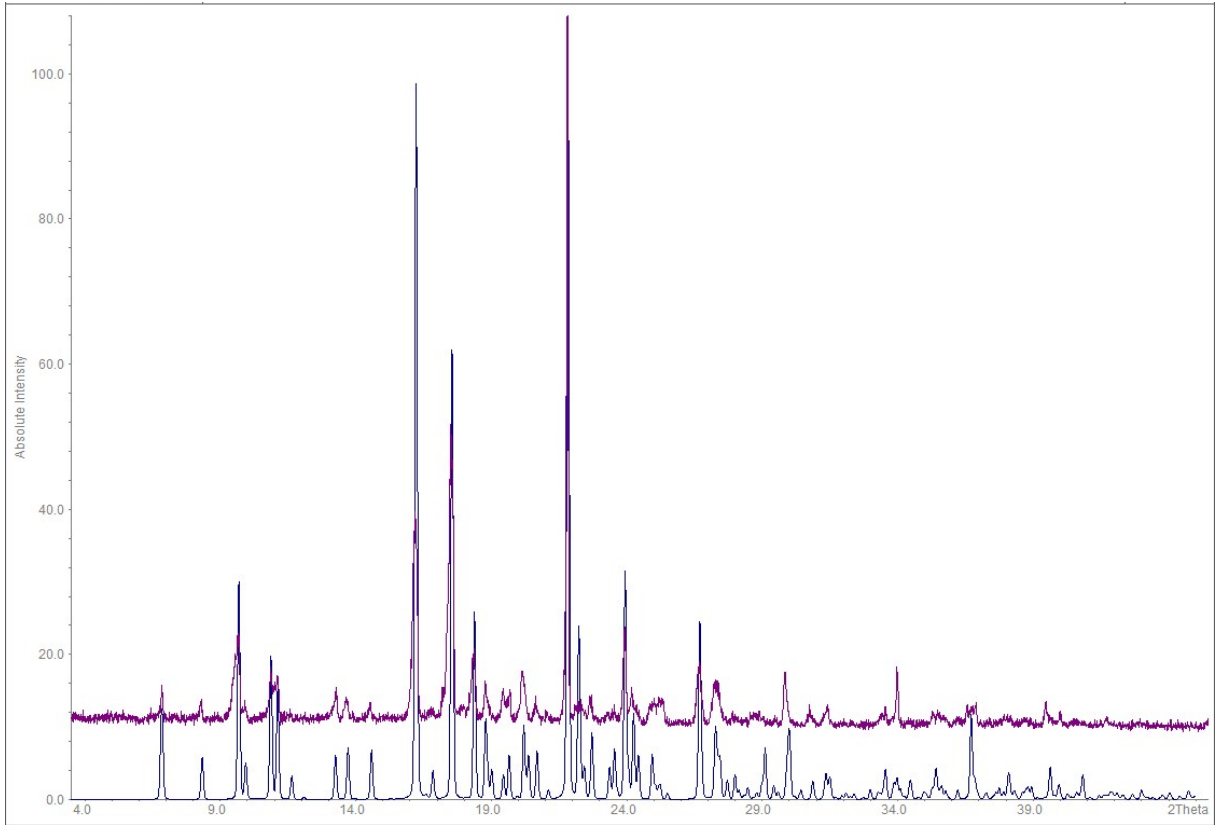

**Figure 4.** PXR D data for Form I: experimental (purple) and theoretical (blue)

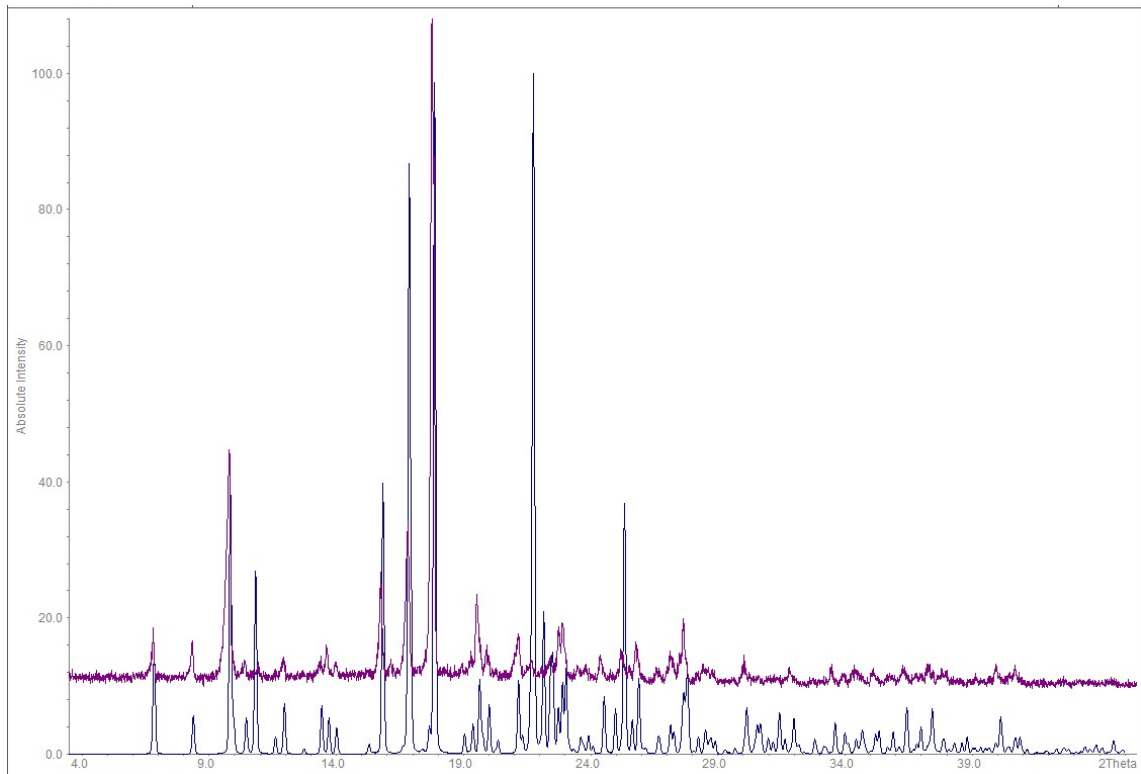

**Figure 5.** PXR D data for Form III: experimental (purple) and theoretical (blue)

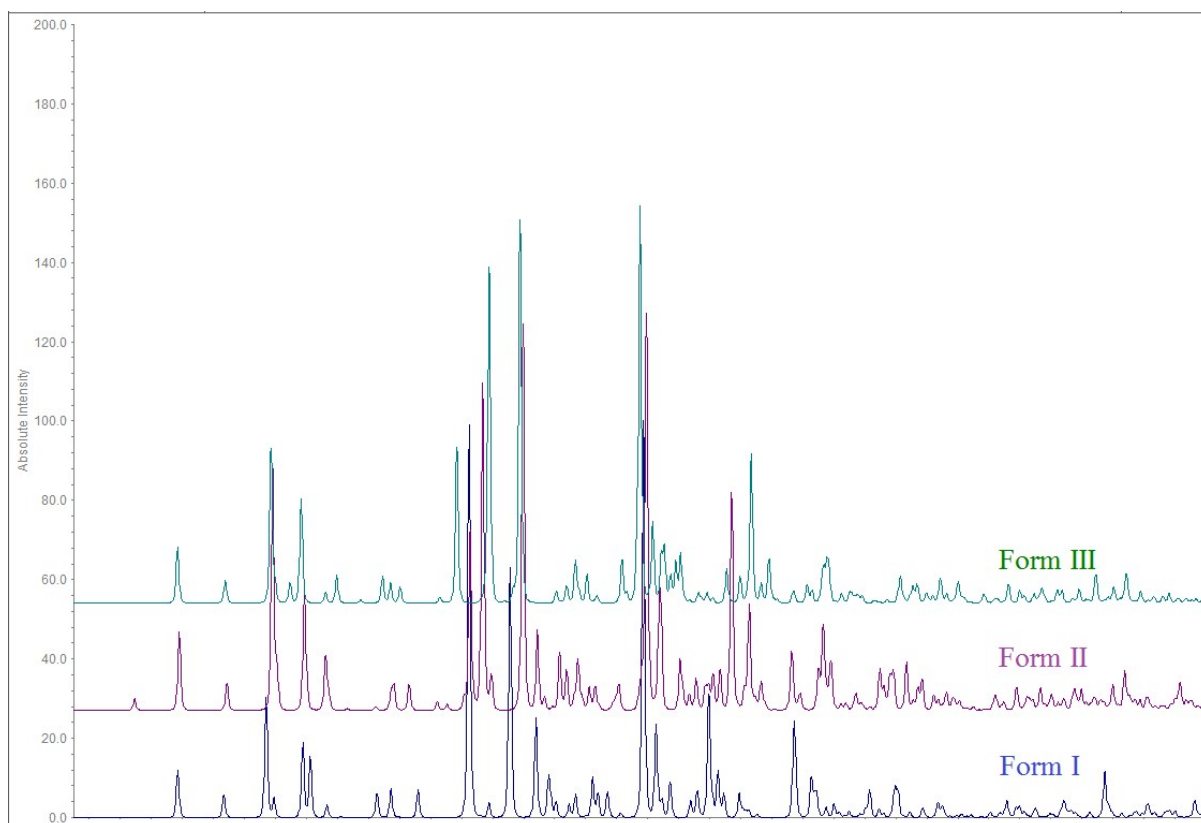

**Figure 6. Theoretical PXRD data for Forms I, II & III.**

**Table 2.** Selected torsion angles for the amide molecules in Forms I, II and III

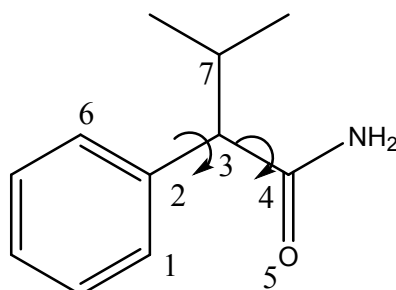

|          | Z' | Molecule | $\tau_1$<br>C1-C2-C3-C4 | $\tau_2$<br>C6-C2-C3-C7 | $\tau_3$<br>C2-C3-C4-O5 | $\tau_4$<br>C2-C3-C4-O5 |
|----------|----|----------|-------------------------|-------------------------|-------------------------|-------------------------|
| Form I   | 2  | R1       | 51.01                   | 101.94                  | -88.20                  | -142.82                 |
|          |    | S2       | -52.13                  | -105.18                 | 82.68                   | 138.41                  |
| Form II  | 4  | R1       | 55.51                   | 106.93                  | -91.21                  | -143.77                 |
|          |    | S2       | -44.27                  | -92.75                  | 96.55                   | 150.43                  |
|          |    | R3       | 51.24                   | 102.79                  | -76.49                  | -130.71                 |
|          |    | S4       | -55.72                  | -111.14                 | 75.24                   | 132.52                  |
| Form III | 2  | R1       | 53.66                   | 106.63                  | -87.40                  | -143.36                 |
|          |    | S2       | -50.46                  | -102.04                 | 92.61                   | 148.74                  |

**Table 3.** Polymorph screen

| Solvent(s)               | Temperature: ~ 18 °C | Temperature: ~ 1 °C |
|--------------------------|----------------------|---------------------|
| Acetone                  | Form I               | Form I              |
| Acetonitrile             | Form I               | Form I              |
| Diethyl ether            | Form I               | Form I              |
| Methanol                 | Form I               | Form I              |
| Tetrahydrofuran          | Form I               | Form I              |
| Toluene + Methanol       | Form I               | Form I              |
| Ethanol                  | Form I               | Form I + Form III   |
| Ethyl acetate            | Form I               | Form I + Form III   |
| Hexane                   | Form I               | Form I + Form III   |
| Chloroform + Methanol    | Form I               | Form I + Form-III   |
| Hexane + Dichloromethane | Form I               | Form I + Form III   |
| Hexane + Methanol        | Form I               | Form I + Form III   |
| Dichloromethane          | Form I               | Form III            |

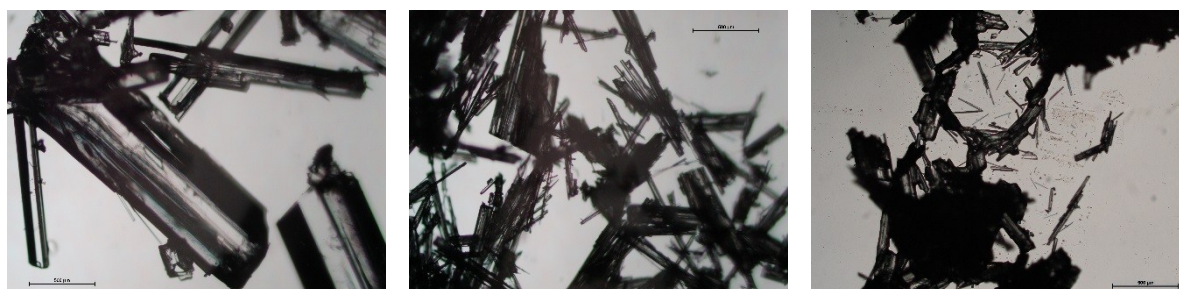**Figure 7.** Microscopic images of Form I, Form III and concomitant crystals respectively



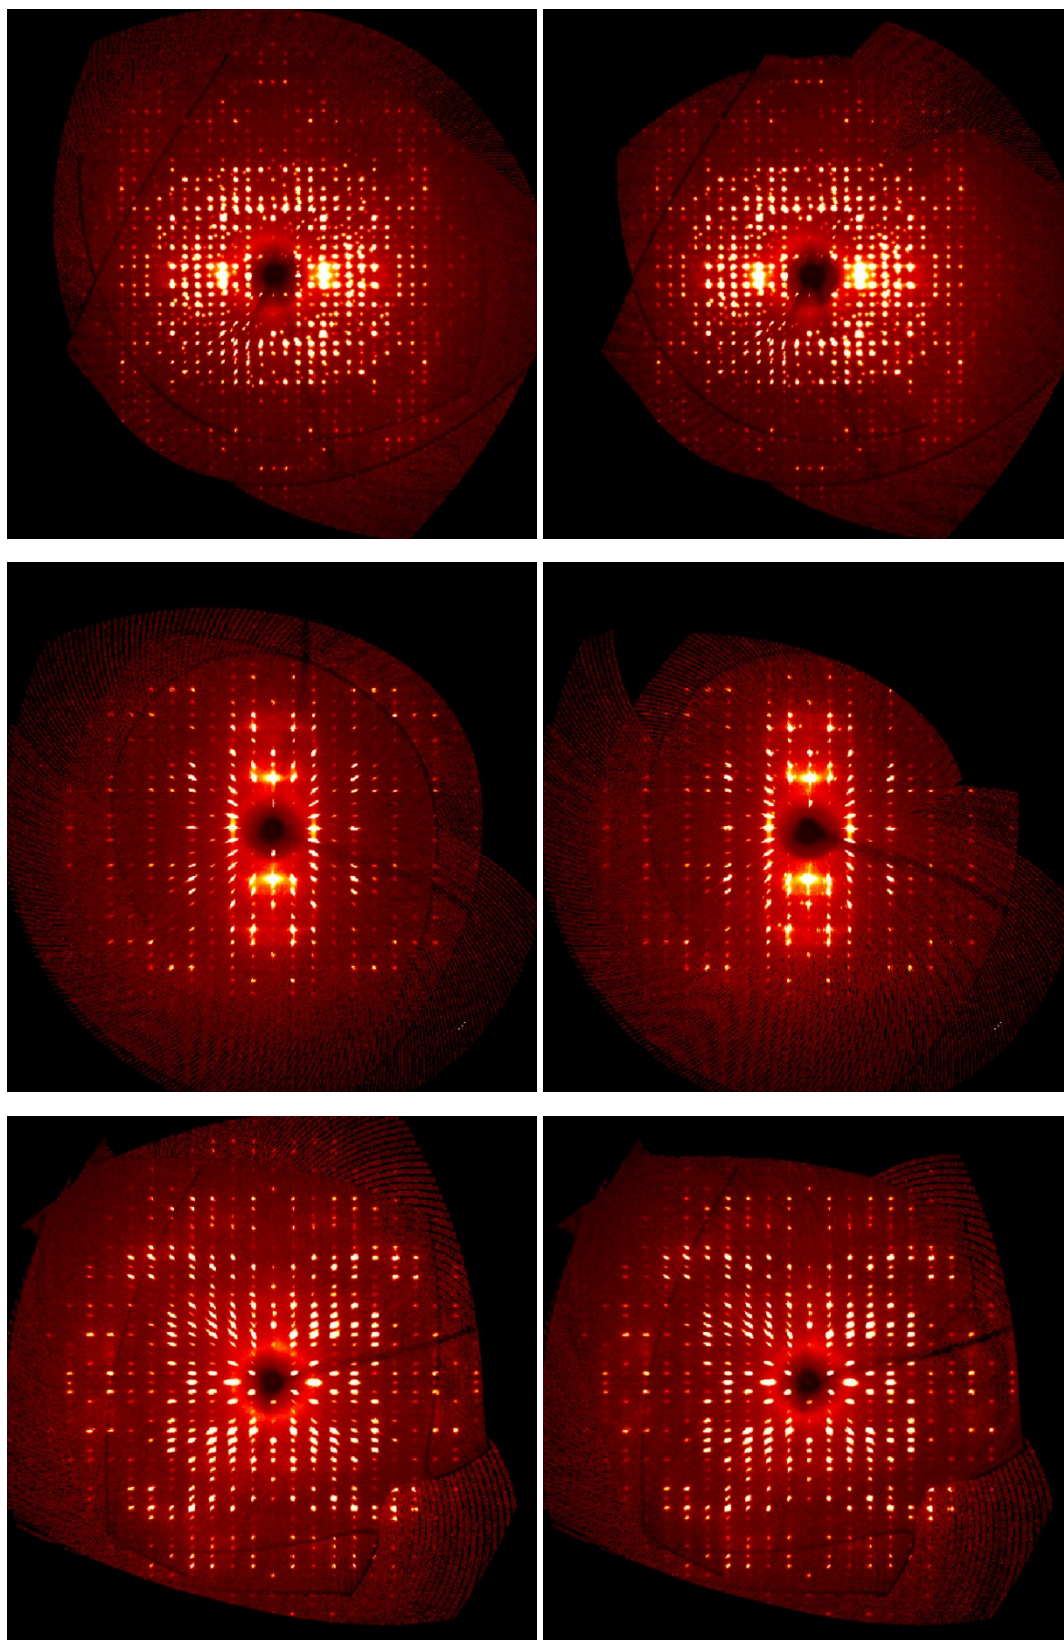

**Figure 8.** Side to side comparison of the precession images for the cocystal collected at 250 K for the 0kl (top), h0l (centre) and hk0 (bottom) planes. Left: before cooling to 100 K, Right: after cooling.

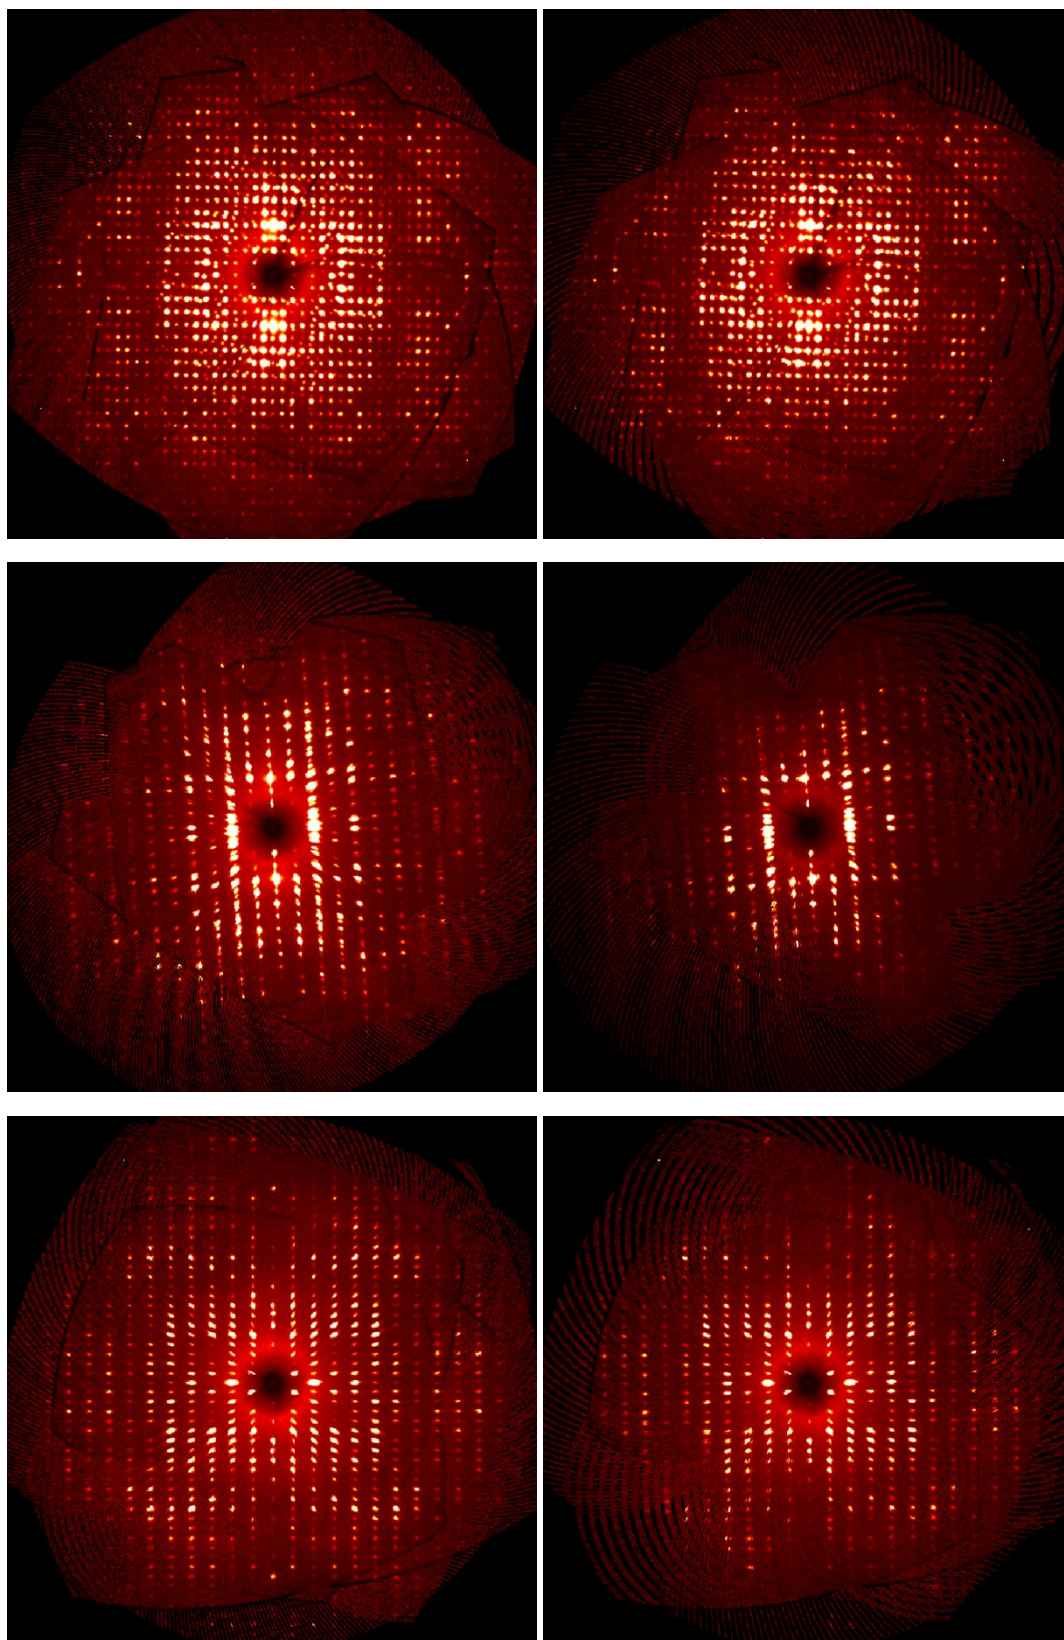

**Figure 9.** Side to side comparison of the precession images for the cocrystal at 150 K (left) and 100 K (right) for the 0kl (top), h0l (centre) and hk0 (bottom) planes.



## Details of periodic DFT calculations

Periodic electronic structure methods for organic crystals based on density functional theory with an essential correction to account for dispersion interaction can generate a reliable energy ranking of different possible crystal structures. Here, the periodic DFT code BAND 2014.<sup>1</sup> was used with Slater atomic orbitals and a TZP basis set for all atoms with the 1s orbitals frozen for oxygen, nitrogen and carbon atoms<sup>2</sup>.  $\gamma$ -point calculations were performed (k-space = 1). Initially, only the positions of the hydrogen atoms were optimized and later all atomic positions were unconstrained. The number of basis functions amounted to 4136 for each calculation.

The BP86<sup>3</sup> and the revPBE<sup>4</sup> exchange-correlation functionals both with Grimme's correction for van-der-Waals interactions<sup>5</sup> and Becke-Johnson damping were used. The PBE functional was shown to yield superior crystal energy landscapes for organic and pharmaceutical non-chiral and chiral structures.

Default convergence criteria of SCF energies, energy conversion and structural optimizations were used.

<sup>1</sup> a) BAND2014, SCM, Theoretical Chemistry, Vrije Universiteit, Amsterdam, The Netherlands, <http://www.scm.com>. b) G. te Velde and E.J. Baerends, *Physical Review B* **44**, 7888 (1991).

<sup>2</sup> E. van Lenthe and E.J. Baerends, *Journal of Computational Chemistry* **24**, 1142 (2003).

<sup>3</sup>a) A.D. Becke, *Physical Review A* **38**, 3098 (1988). b) J.P. Perdew and Y. Wang, *Physical Review B* **33**, 8800 (1986).

<sup>4</sup>a) J.P. Perdew, K. Burke and M. Ernzerhof, *Physical Review Letters* **77**, 3865 (1996). b) Y. Zhang and W. Yang, *Physical Review Letters* **80**, 890 (1998).

<sup>5</sup>S. Grimme, S. Ehrlich, and L. Goerigk, *Journal of Computational Chemistry* **32**, 1457 (2011).

| Relative total lattice energies in kcal/mol | Form I                              | Form II                         | Form III                        |
|---------------------------------------------|-------------------------------------|---------------------------------|---------------------------------|
|                                             | Kryptoracemate, P <sub>212121</sub> | Kryptoracemate, P <sub>21</sub> | Mono-racemic, P <sub>21/c</sub> |
| BP86-D3(BJ)/TZP//single crystal structure   | +369.7                              | 0.0                             | -67.5                           |
| BP86-D3(BJ)/TZP//opt Hs                     | +34.7                               | 0.0                             | +2.0                            |
| revPBE-D3(BJ)/TZP//BP86-D3(BJ) opt Hs       | +31.3                               | +11.7                           | 0.0                             |
| revPBE-D3(BJ)/TZP//revPBE-D3(BJ)/TZP optHs  | +31.0                               | +8.3                            | 0.0                             |

## Slurry Experiments

| Starting Composition          | Product  |
|-------------------------------|----------|
| Form I (pure)                 | Form I   |
| Form I (80%) + Form III (20%) | Form III |
| Form I (20%) + Form III (80%) | Form III |
| Form III (pure)               | Form III |

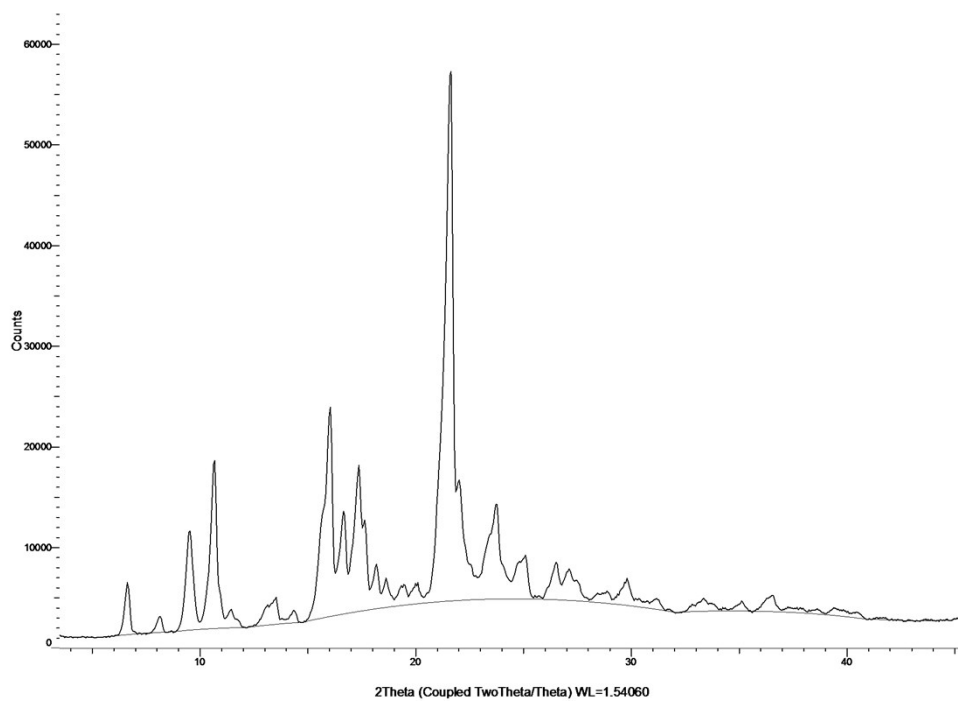

**Figure 10.** Form I obtained from pure Form I starting composition.

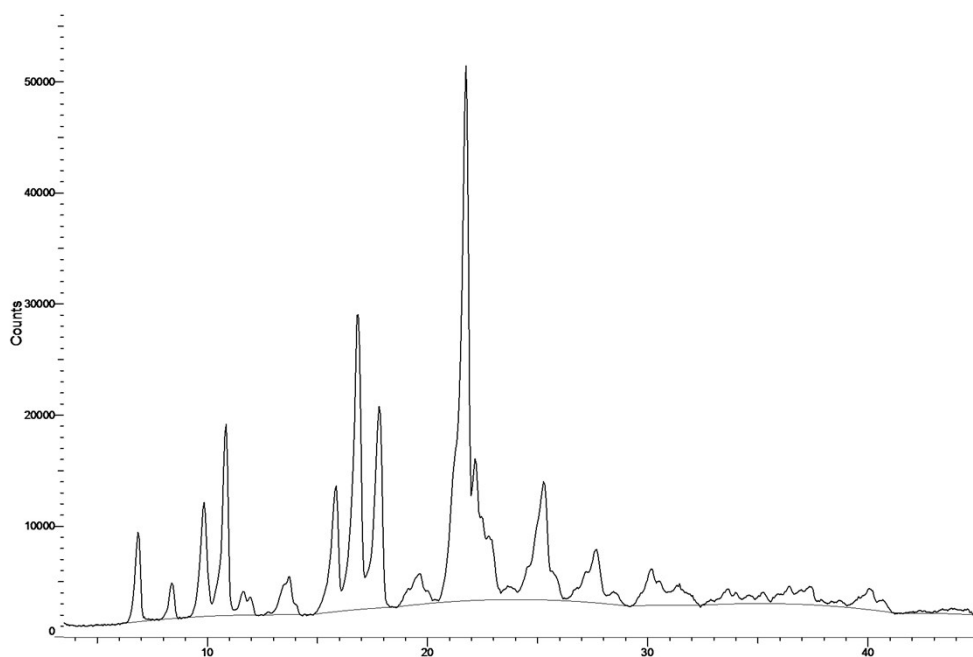

**Figure 11.** Form III obtained from Form I : Form III 80% : 20% starting composition.

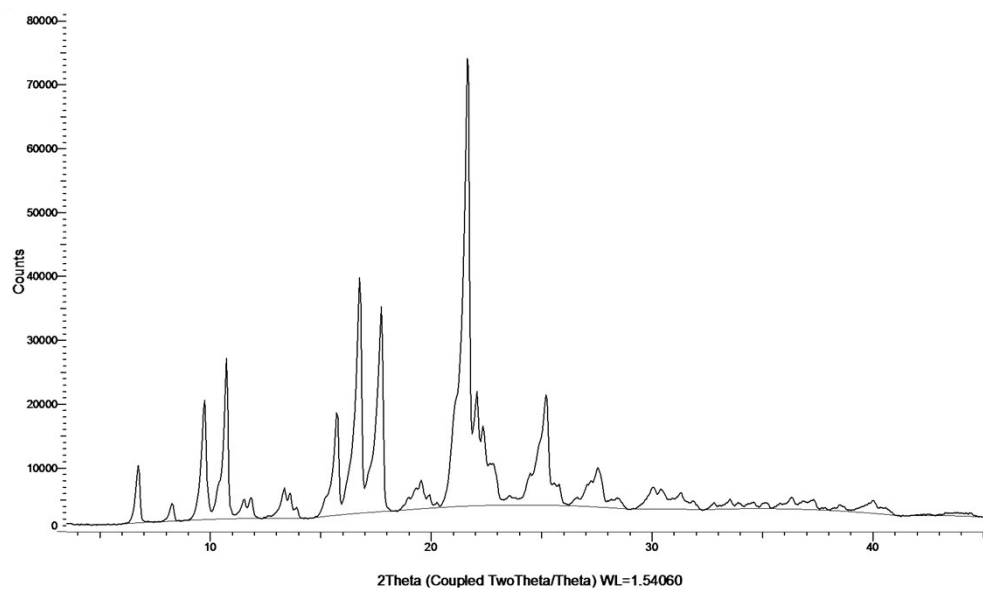

**Figure 12.** Form III obtained from Form I : Form III 20% : 80% starting composition

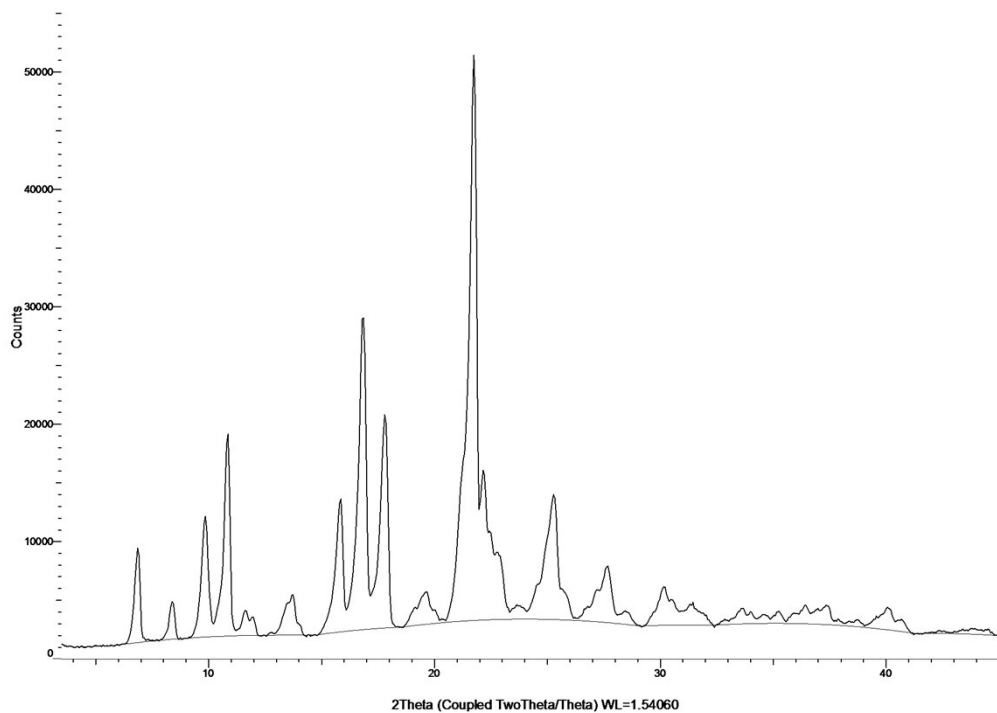

**Figure 13.** Form III obtained from pure Form III starting composition.
